# Supplementary material for: Multiparametric Mapping by Cardiovascular Magnetic Resonance in the Risk Stratification of Ventricular Arrhythmias and Sudden Cardiac Death
Source: Preprints.org preprint supplement (doi:10.20944/preprints202403.1730.v1), 2024-03-28
Supplement: Supplementary file 1 [file supplementary]

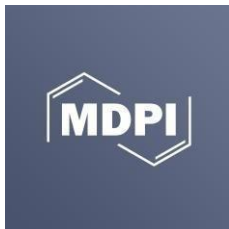

**Multidisciplinary  
Digital Publishing  
Institute**

MDPI AG  
Postfach CH–  
4057 Basel  
Switzerland

Tel. +41 61 683 77 34  
Fax +41 61 302 89 18  
E-Mail: [rordorf@mdpi.com](mailto:rordorf@mdpi.com)  
[www.mdpi.com](http://www.mdpi.com)

## Authorship Contribution Form

(Must be Completed and Signed by ALL Authors)

MDPI follows the International Committee of Medical Journal Editors ([ICMJE](#)) guidelines which state that, in order to qualify for authorship of a manuscript, the following criteria should be observed:

- Substantial contributions to the conception or design of the work; or the acquisition, analysis, or interpretation of data for the work; AND
- Drafting the work or revising it critically for important intellectual content; AND
- Final approval of the version to be published; AND
- Agreement to be accountable for all aspects of the work in ensuring that questions related to the accuracy or integrity of any part of the work are appropriately investigated and resolved.

MDPI journals require that all authors indicate their specific contributions to the preparation of this manuscript by completing this form.

|                           |                                                                                                                                                                                                                                                                                               |
|---------------------------|-----------------------------------------------------------------------------------------------------------------------------------------------------------------------------------------------------------------------------------------------------------------------------------------------|
| Journal Name:             | JCM (Journal of Clinical Medicine)                                                                                                                                                                                                                                                            |
| Manuscript ID (if known): |                                                                                                                                                                                                                                                                                               |
| Manuscript Title:         | Multiparametric mapping by Cardiovascular Magnetic Resonance in the risk stratification of Ventricular Arrhythmias and Sudden Cardiac Death: a literature Review                                                                                                                              |
| Authors:                  | Maria Lo Monaco, Kamil Stankowski, Stefano Figliozzi, Flavia Nicoli, Vincenzo Scialò, Alessandro Gad, Costanza Lisi, Federico Marchini, Carlo Maria Dellino, Rocco Mollace, Federica Catapano, Giulio Giuseppe Stefanini, Lorenzo Monti, Gianluigi Condorelli, Erika Bertella, Marco Francone |
| Corresponding Author(s):  | Stefano Figliozzi                                                                                                                                                                                                                                                                             |

All authors of the paper should:

- ☐ confirm that all listed authors meet the criteria above and all who meet the four criteria are identified as authors
- ☐ confirm that the manuscript has been read and approved by all named authors
- ☐ confirm that the order of authors listed in the manuscript has been approved by all named authors

Please list all the manuscript authors and their contribution in the Contribution Table below. The corresponding author will be responsible to include a summary statement in the text of the manuscript in a separate section “Author Contributions”, that reflects what is recorded in the following table.

List ALL AUTHORS in the same order as the manuscript. (If additional author and signature fields are needed, please duplicate this form as needed):

| Name                      | Contribution (please refer to CrediT in Appendix)        | Signature                                                                             | Date       |
|---------------------------|----------------------------------------------------------|---------------------------------------------------------------------------------------|------------|
| Maria Lo Monaco           | Writing - original draft + investigation                 | 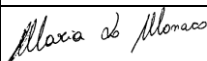   | 26/02/2024 |
| Kamil <u>Stankowski</u>   | Writing - original draft + investigation                 |    | 26/02/2024 |
| Stefano Figliozzi         | Conceptualization + Writing original draft + supervision |    | 26/02/2024 |
| Flavia Nicoli             | Writing - original draft + investigation                 |    | 26/02/2024 |
| Vincenzo Scialò           | Writing - original draft + investigation                 |    | 26/02/2024 |
| Alessandro Gad            | Writing - original draft + investigation                 |    | 26/02/2024 |
| Costanza Lisi             | Writing - original draft + investigation                 |    | 26/02/2024 |
| Federico Marchini         | Writing - original draft + investigation                 |    | 26/02/2024 |
| Carlo Maria Dellino       | Investigation + writing original draft                   |  | 26/02/2024 |
| Rocco Mollace             | Writing - original draft + investigation                 |  | 26/02/2024 |
| Federica Catapano         | Writing original draft                                   |  | 26/02/2024 |
| Giulio Giuseppe Stefanini | Writing - original draft                                 |  | 26/02/2024 |
| Lorenzo Monti             | Writing - original draft + supervision                   |  | 26/02/2024 |
| Gianluigi Condorelli      | Writing - original draft                                 |  | 26/02/2024 |
| Erika Bertella            | Writing original draft + supervision                     |  | 26/02/2024 |
| Marco Francone            | Writing - original draft + supervision                   |  | 26/02/2024 |

## Appendix

### Contributor Roles Taxonomy (CRediT)

|                            |                                                                                                                                                                                                                 |
|----------------------------|-----------------------------------------------------------------------------------------------------------------------------------------------------------------------------------------------------------------|
| Conceptualization          | Ideas; formulation or evolution of overarching research goals and aims.                                                                                                                                         |
| Data curation              | Management activities to annotate (produce metadata), scrub data and maintain research data (including software code, where it is necessary for interpreting the data itself) for initial use and later re-use. |
| Formal analysis            | Application of statistical, mathematical, computational, or other formal techniques to analyze or synthesize study data.                                                                                        |
| Funding acquisition        | Acquisition of the financial support for the project leading to this publication.                                                                                                                               |
| Investigation              | Conducting a research and investigation process, specifically performing the experiments, or data/evidence collection.                                                                                          |
| Methodology                | Development or design of methodology; creation of models.                                                                                                                                                       |
| Project administration     | Management and coordination responsibility for the research activity planning and execution.                                                                                                                    |
| Resources                  | Provision of study materials, reagents, materials, patients, laboratory samples, animals, instrumentation, computing resources, or other analysis tools.                                                        |
| Software                   | Programming, software development; designing computer programs; implementation of the computer code and supporting algorithms; testing of existing code components.                                             |
| Supervision                | Oversight and leadership responsibility for the research activity planning and execution, including mentorship external to the core team.                                                                       |
| Validation                 | Verification, whether as a part of the activity or separate, of the overall replication/reproducibility of results/experiments and other research outputs.                                                      |
| Visualization              | Preparation, creation and/or presentation of the published work, specifically visualization/data presentation.                                                                                                  |
| Writing - original draft   | Preparation, creation and/or presentation of the published work, specifically writing the initial draft (including substantive translation).                                                                    |
| Writing - review & editing | Preparation, creation and/or presentation of the published work by those from the original research group, specifically critical review, commentary or revision – including pre- or post-publication stages.    |
